# Supplementary material for: Insights into Protein Stability in Cell Lysate by 19F NMR Spectroscopy
Source: PubMed Central journal article supplement — Chembiochem. 2020 Sep 16;21(24):3575–9. doi: 10.1002/cbic.202000413 (PMC7756264; doi:10.1002/cbic.202000413), 2020-09-16
Supplement: CBIC-21-3575-s001.pdf [file CBIC-21-3575-s001.pdf]

# ChemBioChem

Supporting Information

## Insights into Protein Stability in Cell Lysate by $^{19}\text{F}$ NMR Spectroscopy

Hannah Welte and Michael Kovermann\*

# Supporting Information

## SUPPORTING INFORMATION

---

### Table of Contents

|                                                        |           |
|--------------------------------------------------------|-----------|
| <b>Experimental Section</b> .....                      | <b>3</b>  |
| Expression and purification of fluorinated BsCspB..... | 3         |
| Preparation of cell lysate samples.....                | 3         |
| NMR spectroscopy.....                                  | 4         |
| <b>Results and Discussion</b> .....                    | <b>5</b>  |
| <b>References</b> .....                                | <b>15</b> |
| <b>Author Contributions</b> .....                      | <b>15</b> |

# SUPPORTING INFORMATION

## Experimental Section

### Expression and purification of fluorinated BsCspB

Fluorinated variants of the cold shock proteins B from *Bacillus subtilis* were expressed in *E. coli* cells (DSMZ 12779 strain has been used for the phenylalanine variant whereas the strain CAG 18455 7371 has been used for the tryptophan variant) by using pET24a CspB and pAR1219 vectors as described before [1]. Protein purification was done as outlined previously [1].

### Preparation of cell lysate samples

An optical density (OD) of 0.55 has been used for the growth of 5-<sup>19</sup>F-Trp-BsCspB whereas OD = 0.71 has been used for the growth of 4-<sup>19</sup>F-Phe-BsCspB regarding harvesting the cells. A volume of 50, 125, and 250 mL of cell culture (Table S4) was centrifuged at 6500 rpm for  $t = 15$  min at  $T = 4$  °C, respectively. The cell pellet was resuspended in  $V = 3.5$ -5 mL TRIS buffer (50 mM TRIS, pH 8) and disrupted by sonication (sonifier W-250, Branson) for 1600 s/100 mL of cell-dispersion with an amplitude of 25 % in cycles of  $t = 2$  s work and  $t = 3$  s break on ice (for details, see Table S4). The cell lysate was centrifuged at 4500 rpm for  $t = 15$  min. From the supernatant two samples were prepared and placed in two separated 5 mm NMR tubes. Both samples contain 95 % H<sub>2</sub>O and 5 % D<sub>2</sub>O (v/v) and trimethylsilylproanoic acid (TMSP) for referencing. Urea was added to one of the two tubes possessing a concentration in the range between about 6 and 7 M. Next, the two samples were mixed among each other to obtain concentrations of urea ranging between 0 and about 7 M and keeping concentrations of all other molecules constant. The following scheme illustrates this experimental setup for probing the folding-to-unfolding reaction of 5-<sup>19</sup>F-Trp-BsCspB under dilute conditions:

| data point | $c_{\text{urea}} / \text{M}$ | sample                                     |
|------------|------------------------------|--------------------------------------------|
| 1          | 5.86                         | Tube 1 (start volume: 1500 $\mu\text{L}$ ) |
| 2          | 0.00                         | Tube 2 (start volume: 1500 $\mu\text{L}$ ) |
| 3          | 5.52                         | Tube 1 + 50 $\mu\text{l}$ of Tube 2        |
| 4          | 0.13                         | Tube 2 + 50 $\mu\text{l}$ of Tube 1        |
| 5          | 5.39                         | Tube 1 + 55 $\mu\text{l}$ of Tube 2        |
| 6          | 0.23                         | Tube 2 + 55 $\mu\text{l}$ of Tube 1        |
| 7          | 5.20                         | Tube 1 + 55 $\mu\text{l}$ of Tube 2        |
| 8          | 0.59                         | Tube 2 + 55 $\mu\text{l}$ of Tube 1        |
| 9          | 5.05                         | Tube 1 + 70 $\mu\text{l}$ of Tube 2        |
| 10         | 0.82                         | Tube 2 + 70 $\mu\text{l}$ of Tube 1        |
| 11         | 4.84                         | Tube 1 + 70 $\mu\text{l}$ of Tube 2        |
| 12         | 1.07                         | Tube 2 + 70 $\mu\text{l}$ of Tube 1        |
| 13         | 4.58                         | Tube 1 + 80 $\mu\text{l}$ of Tube 2        |
| 14         | 1.36                         | Tube 2 + 80 $\mu\text{l}$ of Tube 1        |
| 15         | 4.32                         | Tube 1 + 80 $\mu\text{l}$ of Tube 2        |
| 16         | 1.57                         | Tube 2 + 80 $\mu\text{l}$ of Tube 1        |
| 17         | 4.12                         | Tube 1 + 90 $\mu\text{l}$ of Tube 2        |
| 18         | 1.80                         | Tube 2 + 90 $\mu\text{l}$ of Tube 1        |
| 19         | 3.88                         | Tube 1 + 100 $\mu\text{l}$ of Tube 2       |
| 20         | 2.05                         | Tube 2 + 100 $\mu\text{l}$ of Tube 1       |
| 21         | 3.64                         | Tube 1 + 110 $\mu\text{l}$ of Tube 2       |
| 22         | 2.35                         | Tube 2 + 110 $\mu\text{l}$ of Tube 1       |
| 23         | 3.45                         | Tube 1 + 130 $\mu\text{l}$ of Tube 2       |
| 24         | 2.52                         | Tube 2 + 130 $\mu\text{l}$ of Tube 1       |
| 25         | 3.26                         | Tube 1 + 165 $\mu\text{l}$ of Tube 2       |
| 26         | 2.70                         | Tube 2 + 165 $\mu\text{l}$ of Tube 1       |
| 27         | 3.05                         | Tube 1 + 220 $\mu\text{l}$ of Tube 2       |
| 28         | 2.88                         | Tube 2 + 220 $\mu\text{l}$ of Tube 1       |
| 29         | 2.98                         | Tube 1 + 300 $\mu\text{l}$ of Tube 2       |
| 30         | 2.98                         | Tube 2 + 300 $\mu\text{l}$ of Tube 1       |

## NMR spectroscopy

All one-dimensional  $^1\text{H}$  and  $^{19}\text{F}$  NMR spectra were acquired on an 800 MHz Bruker Avance NEO NMR spectrometer equipped with a TCI cryogenically cooled probe at  $T = 298\text{ K}$ . Two-dimensional  $^1\text{H}$ - $^{15}\text{N}$  HSQC NMR spectrum of cell lysate were collected on the 800 MHz spectrometer, too. Exceptionally, the one-dimensional  $^1\text{H}$  NMR spectra of  $c^{5-^{19}\text{F-Trp-BsCspB}} = 8\ \mu\text{M}$  as well as the two-dimensional  $^1\text{H}$ - $^{15}\text{N}$  HSQC NMR spectrum (under dilute conditions) of this protein variant were acquired on a 600 MHz Bruker Avance III NMR spectrometer also equipped with a TCI cryogenically cooled probe at  $T = 298\text{ K}$ . The proton resonance frequency of Trimethylsilylproanoic acid (TMSP) was used for direct referencing of the  $^1\text{H}$  dimension and for indirect referencing of the  $^{19}\text{F}$  dimension. Data processing of one-dimensional spectra was done by using TOPSPIN 4.0.3 software (Bruker Biospin, Germany). Processing of two-dimensional NMR data was done by using NMRPipe [2].

The overall thermodynamic stability of fluorinated *BsCspB* has been determined at different cell lysate concentrations by using one-dimensional  $^{19}\text{F}$  NMR spectra obtained at different concentrations of urea ranging between  $c = 0\text{ M}$  and  $c = 7\text{ M}$  by mixing two NMR tubes among each other (see above). Furthermore, the overall thermodynamic stability of fluorinated *BsCspB* was determined under dilute conditions using a protein concentration of  $c = 100\ \mu\text{M}$  for 4- $^{19}\text{F}$ -Phe-*BsCspB* and  $c = 200\ \mu\text{M}$  for 5- $^{19}\text{F}$ -Trp-*BsCspB* applying both one-dimensional  $^1\text{H}$  and  $^{19}\text{F}$  NMR spectroscopy, respectively. Additionally, the overall thermodynamic stability of 5- $^{19}\text{F}$ -Trp-*BsCspB* was determined under dilute conditions at a protein concentration of  $c = 8\ \mu\text{M}$  using one-dimensional  $^1\text{H}$  NMR spectroscopy. Specific ranges of chemical shifts were used to determine the fraction of native protein,  $f_N$ . In detail, one range of chemical shifts representing resonance signals seen for the folded state,  $I_N$ , and a second range of chemical shifts representing resonance signals seen for folded state and unfolded protein ensemble,  $I_{N+U}$ , were used for the analysis of one-dimensional  $^1\text{H}$  NMR spectra acquired for 4- $^{19}\text{F}$ -Phe-*BsCspB* and 5- $^{19}\text{F}$ -Trp-*BsCspB* and of one-dimensional  $^{19}\text{F}$  NMR spectra acquired for 4- $^{19}\text{F}$ -Phe-*BsCspB*. Contrary, a range of chemical shifts comprising native state signals,  $I_N$ , and resonance signals seen solely for the unfolded protein ensemble,  $I_U$ , were used for the analysis of  $^{19}\text{F}$  NMR spectra of 5- $^{19}\text{F}$ -Trp-*BsCspB*. Calculating the ratio  $I_N/(I_N+I_{N+U})$  or  $I_N/(I_N+I_U)$  makes it possible to determine the population of the folded state,  $f_N$ , of 4- $^{19}\text{F}$ -Phe-*BsCspB* and 5- $^{19}\text{F}$ -Trp-*BsCspB* at any concentration of urea, respectively.

The fraction of folded protein,  $f_N$ , was then used in equation (S1) to determine, firstly, the difference in free energy between the folded state and the unfolded protein ensemble of *BsCspB*,  $\Delta G^0$ , and, secondly, the cooperativity of protein unfolding,  $m$ :

$$f_N = \frac{(g_N + m_N * c_{\text{urea}}) + (g_U + m_U * c_{\text{urea}}) * \left( \exp\left(-\frac{\Delta G^0}{RT}\right) + \frac{m * c_{\text{urea}}}{RT} \right)}{1 + \left( \exp\left(-\frac{\Delta G^0}{RT}\right) + \frac{m * c_{\text{urea}}}{RT} \right)}, \quad (\text{S1})$$

where  $f_N$  represents the fraction of folded protein,  $g_{N/U}$  and  $m_{N/U}$  account for the baselines of the folded state and the unfolded protein ensemble,  $R$  is the universal gas constant,  $c_{\text{urea}}$  is the concentration of urea and  $T$  is the absolute temperature [3]. The folding cooperativity,  $m$ , was used as a global parameter analyzing seven  $^{19}\text{F}$  NMR and two  $^1\text{H}$  NMR data sets following folding-to-unfolding transition. Thus,  $m$  was determined to  $m = -3.3 \pm 0.1\text{ kJ}/(\text{molM})$ . This value was then utilized to analyze the folding-to-unfolding transition of 5- $^{19}\text{F}$ -Trp-*BsCspB* using a protein concentration of  $c = 8\ \mu\text{M}$ .

Trifluoroacetic acid (TFA) with known concentration was added to the respective protein sample enabling the determination of the concentration of the protein present in cell lysate by integration of resonance signals present in an one-dimensional  $^{19}\text{F}$  NMR spectrum (Figure S10).

The concentration of urea,  $c^{\text{urea}}$ , was determined by measuring the refractive index applying dilute conditions [4]. This method is not applicable to samples at cell lysate condition due to the presence of a large signal background. Nevertheless, since the initial concentrations of  $c^{\text{urea}}$  in cell lysate samples was known respective  $c^{\text{urea}}$  values determining the x-coordinate in a folding-to-unfolding transition could be determined using sample volumes which have been used during the mixing of the two NMR tubes among each other.

# SUPPORTING INFORMATION

## Results and Discussion

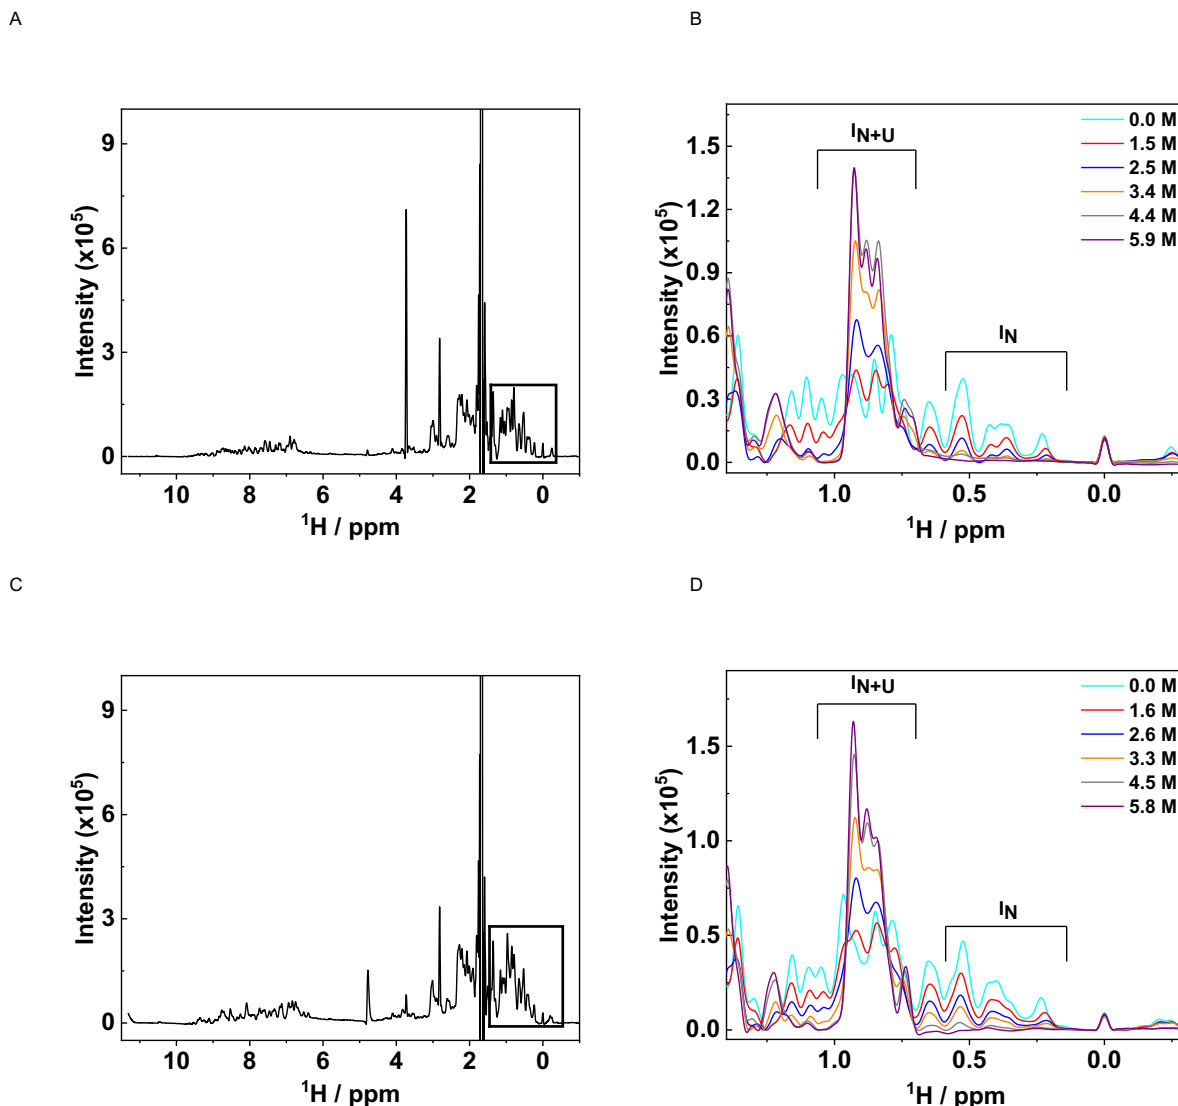

**Figure S1**

One-dimensional  $^1\text{H}$  NMR spectrum of  $5\text{-}^{19}\text{F}\text{-Trp-BsCspB}$  acquired at  $c^{\text{urea}} = 0\text{ M}$  under dilute conditions at  $T = 298\text{ K}$  and  $B_0 = 18.8\text{ T}$ . The spectral range shown in (B) is indicated by using a box in (A). For the determination of the fraction of native protein,  $f_N$  (see equation (S1)), two spectral ranges differing in chemical shifts were used. The first range,  $I_N$ , represents resonance signals observed solely for the native state and covers chemical shifts between  $0.59\text{ ppm}$  and  $0.14\text{ ppm}$  ((B) and (D)). The second range,  $I_{N+U}$ , covers chemical shifts between  $0.697\text{ ppm}$  and  $1.064\text{ ppm}$  and represents resonance signals for both the native state and the unfolded protein ensemble, respectively ((B) and (D)). Both chemical shifts and resonance signal intensities of aliphatic protons of  $5\text{-}^{19}\text{F}\text{-Trp-BsCspB}$  are directly dependent on the concentration of urea which has been applied:  $c^{\text{urea}} = 0\text{ M}$  is colored in cyan,  $c^{\text{urea}} = 1.5\text{ M}$  is colored in red,  $c^{\text{urea}} = 2.5\text{ M}$  is colored in blue,  $c^{\text{urea}} = 3.4\text{ M}$  is colored in orange,  $c^{\text{urea}} = 4.4\text{ M}$  is colored in gray and  $c^{\text{urea}} = 5.9\text{ M}$  is colored in magenta. (C) One-dimensional  $^1\text{H}$  NMR spectrum of  $4\text{-}^{19}\text{F}\text{-Phe-BsCspB}$  acquired at  $c^{\text{urea}} = 0\text{ M}$  under dilute conditions at  $T = 298\text{ K}$  and  $B_0 = 18.8\text{ T}$ . The spectral range shown in (D) is indicated by using a box in (C). Both chemical shifts and resonance signal intensities of aliphatic protons of  $4\text{-}^{19}\text{F}\text{-Phe-BsCspB}$  are directly dependent on the concentration of urea which has been applied:  $c^{\text{urea}} = 0\text{ M}$  is colored in cyan,  $c^{\text{urea}} = 1.6\text{ M}$  is colored in red,  $c^{\text{urea}} = 2.6\text{ M}$  is colored in blue,  $c^{\text{urea}} = 3.3\text{ M}$  is colored in orange,  $c^{\text{urea}} = 4.5\text{ M}$  is colored in gray and  $c^{\text{urea}} = 5.8\text{ M}$  is colored in magenta.

## SUPPORTING INFORMATION

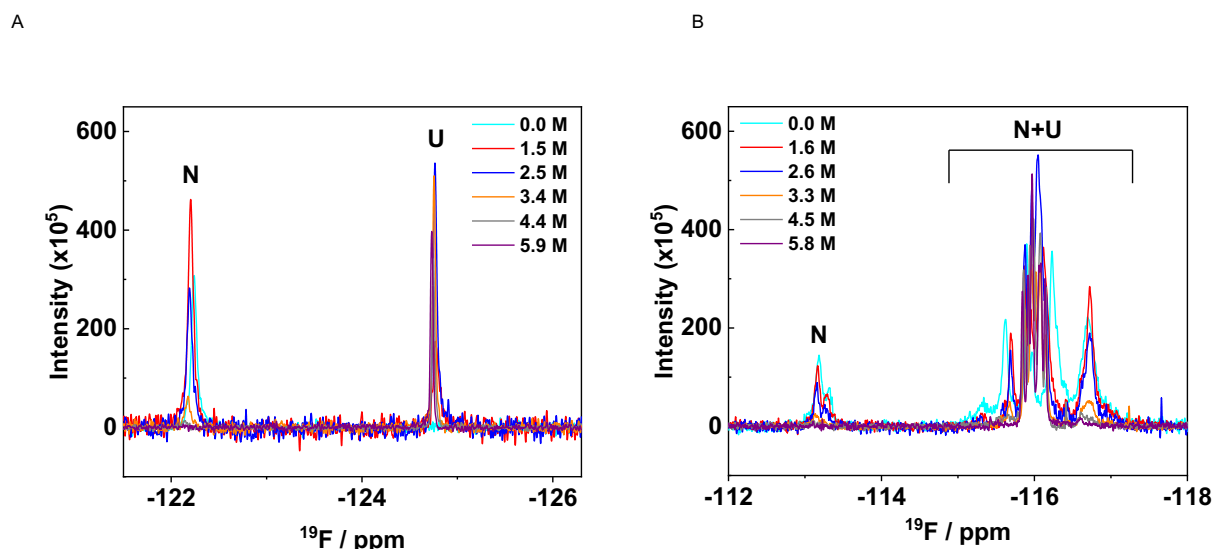

**Figure S2**

(A) One-dimensional  $^{19}\text{F}$  NMR spectra of  $5\text{-}^{19}\text{F}\text{-Trp-BsCspB}$  comprising a single fluorinated site at sequence position W8 acquired at different concentrations of urea ( $c^{\text{urea}} = 0\text{ M}$  colored in cyan,  $c^{\text{urea}} = 1.5\text{ M}$  colored in red,  $c^{\text{urea}} = 2.5\text{ M}$  colored in blue,  $c^{\text{urea}} = 3.4\text{ M}$  colored in orange,  $c^{\text{urea}} = 4.4\text{ M}$  colored in gray and  $c^{\text{urea}} = 5.9\text{ M}$  colored in magenta) under dilute conditions at  $T = 298\text{ K}$  and  $B_0 = 18.8\text{ T}$ . The fluorine resonance signal representing the native state of  $5\text{-}^{19}\text{F}\text{-Trp-BsCspB}$  is highlighted by "N" whereas the resonance signal of the unfolded protein ensemble is indicated by "U". (B) One-dimensional  $^{19}\text{F}$  NMR spectra of  $4\text{-}^{19}\text{F}\text{-Phe-BsCspB}$  comprising seven fluorinated sites at sequence positions F9, F15, F17, F27, F30, F38, and F49 acquired at different concentrations of urea ( $c^{\text{urea}} = 0\text{ M}$  colored in cyan,  $c^{\text{urea}} = 1.6\text{ M}$  colored in red,  $c^{\text{urea}} = 2.6\text{ M}$  colored in blue,  $c^{\text{urea}} = 3.3\text{ M}$  colored in orange,  $c^{\text{urea}} = 4.5\text{ M}$  colored in gray and  $c^{\text{urea}} = 5.8\text{ M}$  colored in magenta) under dilute conditions at  $T = 298\text{ K}$  and  $B_0 = 18.8\text{ T}$ . Fluorine resonance signals representing the native state of  $4\text{-}^{19}\text{F}\text{-Phe-BsCspB}$  – which are spectrally separated – are highlighted by "N" whereas resonance signals representing the native state and the unfolded protein ensemble are indicated by "N+U".

## SUPPORTING INFORMATION

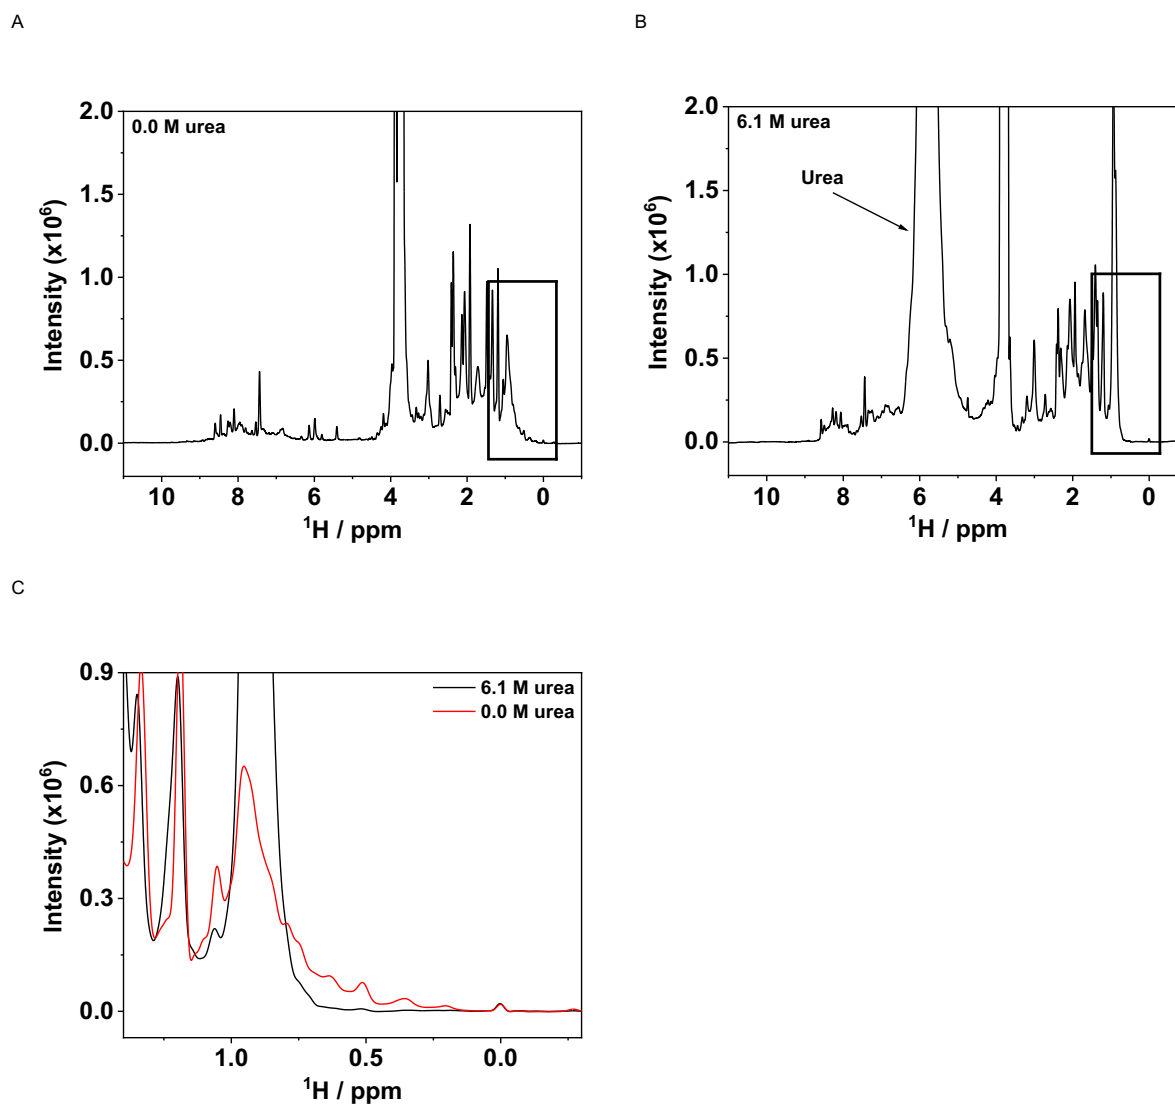

Figure S3

One dimensional  $^1\text{H}$  NMR spectra of  $5\text{-}^{19}\text{F}\text{-Trp-BsCspB}$  in cell lysate with  $c = 0.0$  M urea (A) and  $c = 6.1$  M urea (B). Cell lysate concentration of  $c = 260$  g/L was used. The spectral range shown in (C) is indicated by using a box in (A) and (B). The large signal intensity at about 6 ppm in (B) originates from urea.



# SUPPORTING INFORMATION

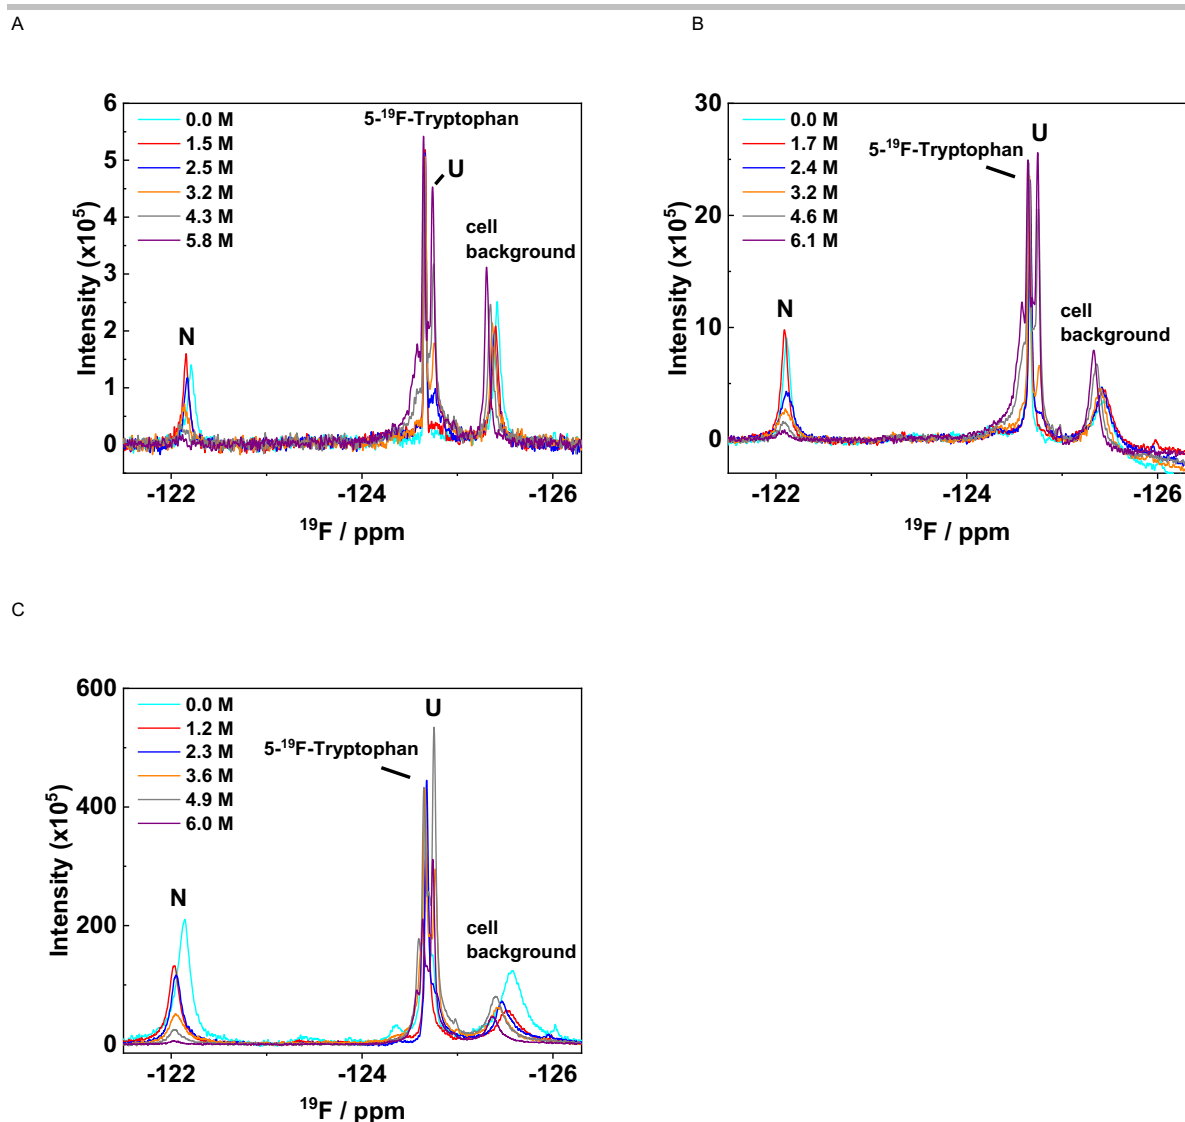

Figure S4

One-dimensional  $^{19}\text{F}$  NMR spectra of  $5\text{-}^{19}\text{F}\text{-Trp-BsCspB}$  acquired at different concentrations of urea in cell lysate at  $T = 298$  K and  $B_0 = 18.8$  T. The following concentrations of cell lysate have been used:  $c = 120$  g/L (A),  $c = 260$  g/L (B) and  $c = 450$  g/L (C). The increasing concentration of urea is represented by applying a color code used for plotting the NMR spectra ranging from cyan to red, blue, orange, gray and finally to magenta. The resonance signals of free  $5\text{-}^{19}\text{F}\text{-Trp}$ , of native state ("N") and the unfolded protein ensemble ("U") of  $5\text{-}^{19}\text{F}\text{-Trp-BsCspB}$  are indicated. Resonance signals arising from the background of the cells have been labelled, too.

## SUPPORTING INFORMATION

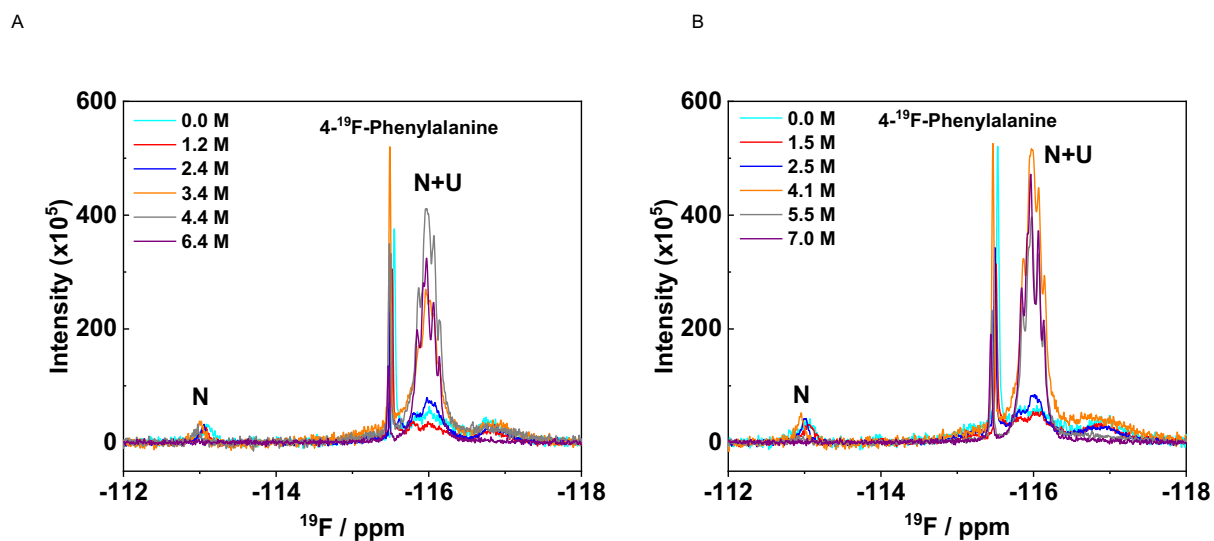

Figure S5

One-dimensional  $^{19}\text{F}$  NMR spectra of  $4\text{-}^{19}\text{F}$ -Phe-*BsCspB* acquired at different concentrations of urea in cell lysate at  $T = 298$  K and  $B_0 = 18.8$  T. The following concentrations of cell lysate have been used:  $c = 150$  g/L (A) and  $c = 450$  g/L (B). The increasing concentration of urea is represented by applying a color code used for plotting the NMR spectra ranging from cyan to red, blue, orange, gray and finally to magenta. The resonance signals of free  $4\text{-}^{19}\text{F}$ -Phe, of native state ("N") and native state plus the unfolded protein ensemble ("N+U") of  $4\text{-}^{19}\text{F}$ -Phe-*BsCspB* are indicated.

## SUPPORTING INFORMATION

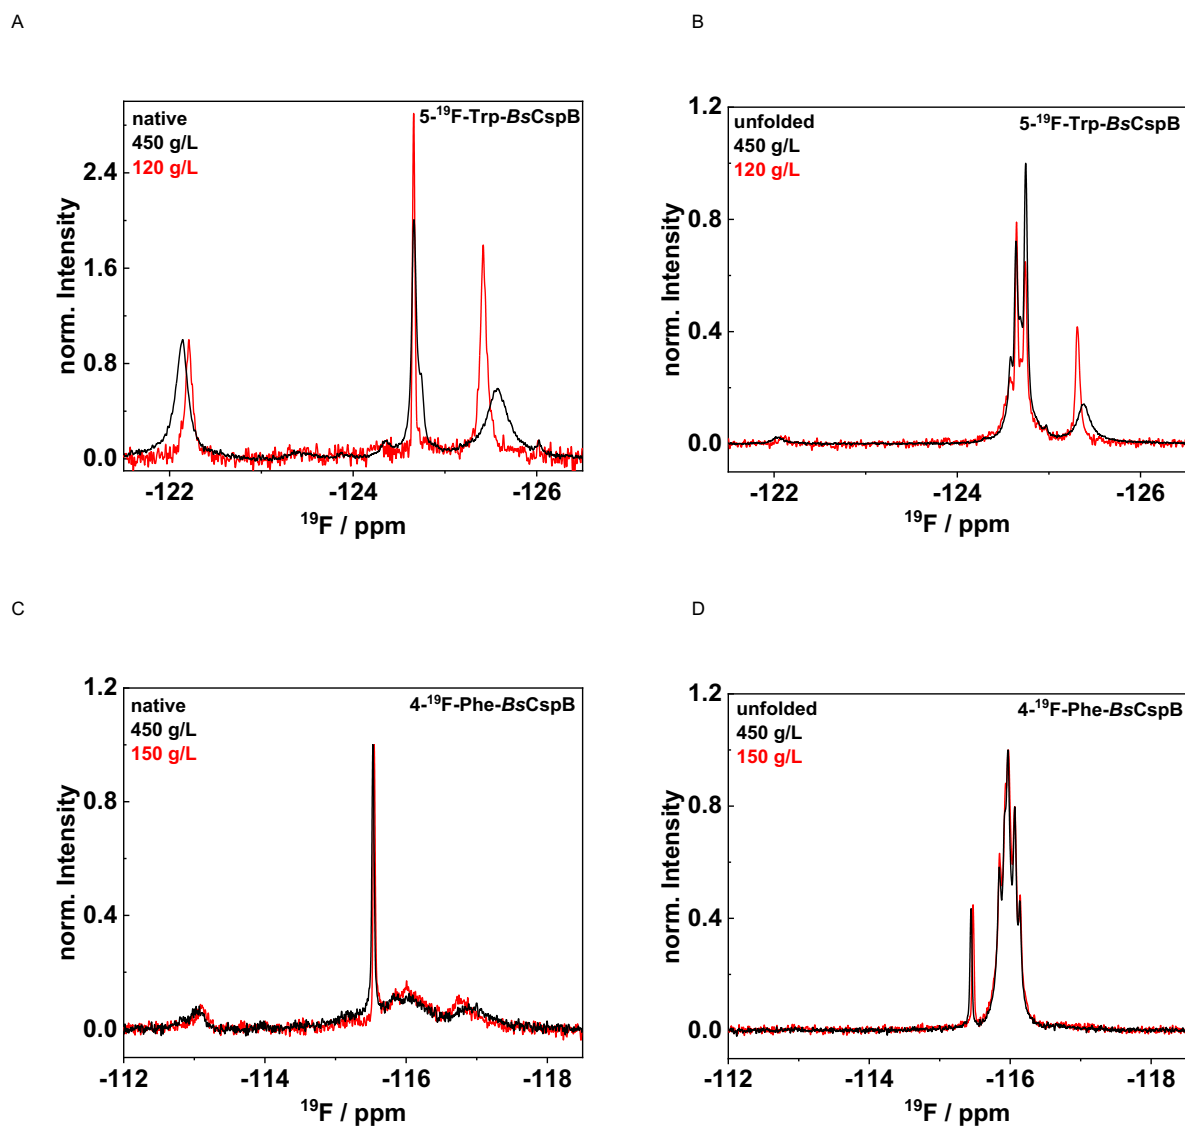

Figure S6

(A) One-dimensional  $^{19}\text{F}$  NMR spectra representing the folded state of  $5\text{-}^{19}\text{F-Trp-BsCspB}$  present at  $c^{\text{urea}} = 0.0\text{ M}$  and  $c^{\text{cell lysate}} = 120\text{ g/L}$  (colored in red) or  $c^{\text{urea}} = 0.0\text{ M}$  and  $c^{\text{cell lysate}} = 450\text{ g/L}$  (colored in black). (B) One-dimensional  $^{19}\text{F}$  NMR spectra representing the unfolded protein ensemble of  $5\text{-}^{19}\text{F-Trp-BsCspB}$  present at  $c^{\text{urea}} = 5.5\text{ M}$  and  $c^{\text{cell lysate}} = 120\text{ g/L}$  (colored in red) or  $c^{\text{urea}} = 5.5\text{ M}$  and  $c^{\text{cell lysate}} = 450\text{ g/L}$  (colored in black). (C) One-dimensional  $^{19}\text{F}$  NMR spectra representing the folded protein ensemble of  $4\text{-}^{19}\text{F-Phe-BsCspB}$  present at  $c^{\text{urea}} = 0.0\text{ M}$  and  $c^{\text{cell lysate}} = 150\text{ g/L}$  (colored in red) or  $c^{\text{urea}} = 0.0\text{ M}$  and  $c^{\text{cell lysate}} = 450\text{ g/L}$  (colored in black). (D) One-dimensional  $^{19}\text{F}$  NMR spectra representing the unfolded protein ensemble of  $4\text{-}^{19}\text{F-Phe-BsCspB}$  present at  $c^{\text{urea}} = 5.2\text{ M}$  and  $c^{\text{cell lysate}} = 150\text{ g/L}$  (colored in red) or  $c^{\text{urea}} = 5.3\text{ M}$  and  $c^{\text{cell lysate}} = 450\text{ g/L}$  (colored in black).

# SUPPORTING INFORMATION

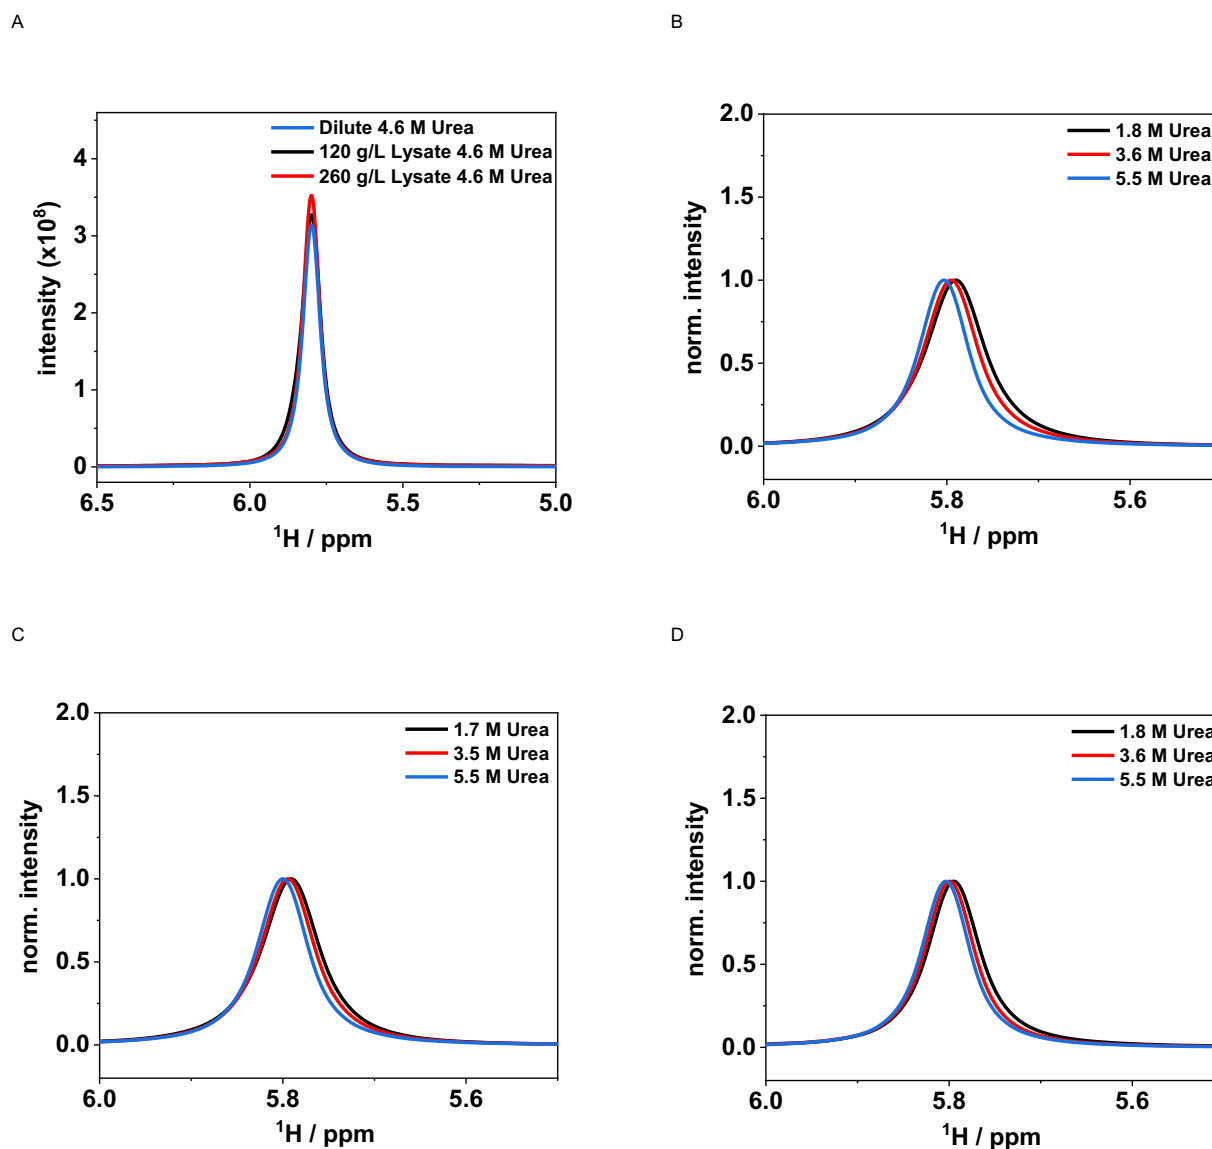

**Figure S7**

Analysis of the chemical shift arising from urea in one-dimensional proton NMR spectra. All data have been acquired at  $T = 298$  K. (A) Proton resonance signal originating from solutions containing a concentration of 4.6 M urea applying different experimental conditions while all acquisition parameters have been kept constant. Data acquisition has been done under dilute conditions (colored in blue), 120 g/L cell lysate (colored in black), and 260 g/L cell lysate (colored in red) concentration. (B) Proton resonance signal originating from solutions containing different urea concentrations under dilute conditions. Data acquisition has been done in presence of  $c^{\text{urea}} = 1.8$  M ( $\omega^{1\text{H}} \approx 5.790$  ppm, colored in black),  $c^{\text{urea}} = 3.6$  M ( $\omega^{1\text{H}} \approx 5.795$  ppm, colored in red),  $c^{\text{urea}} = 5.5$  M ( $\omega^{1\text{H}} \approx 5.803$  ppm, colored in blue). (C) Proton resonance signal originating from solutions containing different urea concentrations in presence of 120 g/L cell lysate. Data acquisition has been done in presence of  $c^{\text{urea}} = 1.7$  M ( $\omega^{1\text{H}} \approx 5.791$  ppm, colored in black),  $c^{\text{urea}} = 3.5$  M ( $\omega^{1\text{H}} \approx 5.795$  ppm, colored in red),  $c^{\text{urea}} = 5.5$  M ( $\omega^{1\text{H}} \approx 5.800$  ppm, colored in blue). (D) Proton resonance signal originating from solutions containing different urea concentrations in presence of 450 g/L cell lysate. Data acquisition has been done in presence of  $c^{\text{urea}} = 1.8$  M ( $\omega^{1\text{H}} \approx 5.795$  ppm, colored in black),  $c^{\text{urea}} = 3.6$  M ( $\omega^{1\text{H}} \approx 5.8000$  ppm, colored in red),  $c^{\text{urea}} = 5.5$  M ( $\omega^{1\text{H}} \approx 5.804$  ppm, colored in blue). These experimental data have been obtained during the acquisition of folding-to-unfolding transitions of  $5\text{-}^{19}\text{F}\text{-Trp-BsCspB}$  ( $c = 200$   $\mu\text{M}$  (dilute conditions),  $c = \sim 5$   $\mu\text{M}$  (120 g/L cell lysate),  $c = \sim 25$   $\mu\text{M}$  (260 g/L cell lysate),  $c = \sim 70$   $\mu\text{M}$  (450 g/L cell lysate)).

## SUPPORTING INFORMATION

---

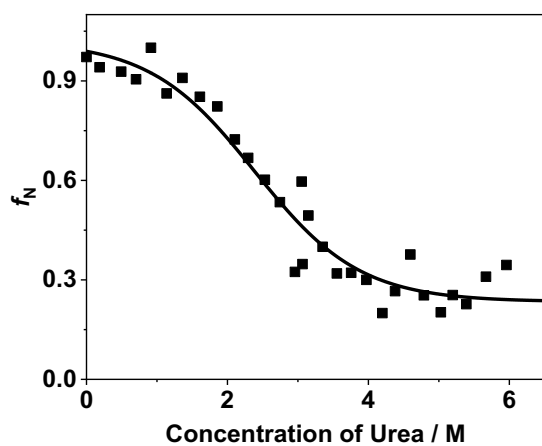

**Figure S8**

Folding-to-unfolding transition determined for 5-<sup>19</sup>F-Trp-BsCspB induced by an increasing concentration of urea under dilute conditions acquired at  $T = 298$  K by using a protein concentration of  $c = 8 \mu\text{M}$  only. The overall thermodynamic stability  $\Delta G^0$  has been determined to  $\Delta G^0 = (7.8 \pm 0.5)$  kJ/mol using a folding cooperativity,  $m$ , of  $m = -3.3 \pm 0.1$  kJ/(molM).

## SUPPORTING INFORMATION

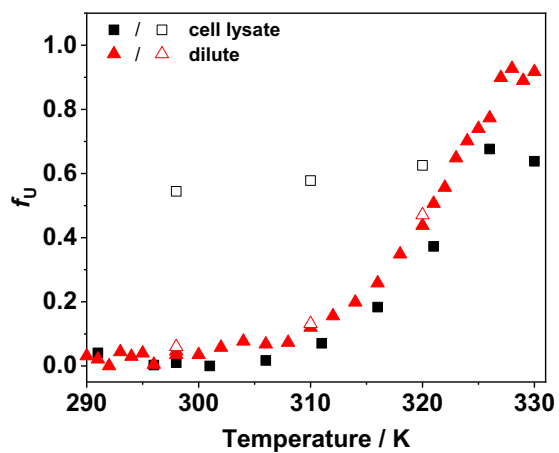

Figure S9

Folding-to-unfolding transition determined for 5-<sup>19</sup>F-Trp-BsCspB induced by increasing temperature under dilute conditions (triangles, colored in red) and in cell lysate (rectangles, colored in black). The direction of the increase in temperature is represented by using closed symbols whereas lowering the temperature is represented by open symbols. The concentration of cell lysate was set to 240 g pellet per L lysis buffer. Experimental data have been obtained by acquiring one-dimensional fluorine NMR spectra and the fraction of the unfolded protein ensemble,  $f_u$ , has been calculated as outlined in the Materials and Methods part.

## SUPPORTING INFORMATION

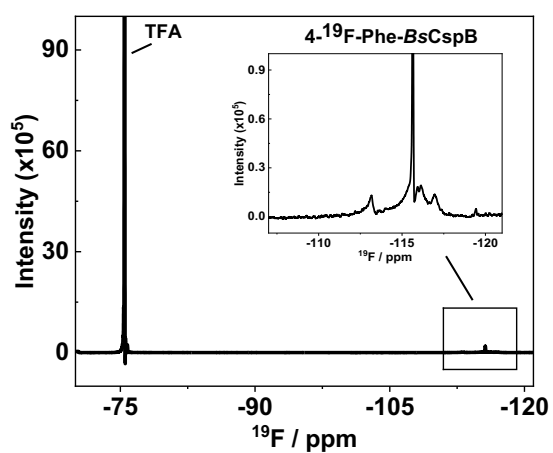

Figure S10

One-dimensional  $^{19}\text{F}$  NMR spectrum comprising resonances of Trifluoroacetic acid (TFA) and  $4\text{-}^{19}\text{F}\text{-Phe-BsCspB}$  acquired in cell lysate at  $T = 298 \text{ K}$  and  $B_0 = 18.8 \text{ T}$ . The resonance signal of TFA originating from a concentration of  $2 \text{ mM}$  was used here to determine the concentration of  $4\text{-}^{19}\text{F}\text{-Phe-BsCspB}$  in cell lysate. The resonance signal at about  $\omega^{19\text{F}} = -115.5 \text{ ppm}$  indicates free  $4\text{-}^{19}\text{F}\text{-Phe}$  present in cell lysate. The results obtained for the concentration of  $4\text{-}^{19}\text{F}\text{-Phe-BsCspB}$  and  $5\text{-}^{19}\text{F}\text{-Trp-BsCspB}$  in cell lysate by using this methodology are presented in Tables S1, S2.

## SUPPORTING INFORMATION

**Table S1.** Estimation of the concentration of 4-<sup>19</sup>F-Phe-BsCspB present at different concentrations of cell lysate determined by applying one-dimensional <sup>19</sup>F NMR spectroscopy and using the resonance signal of TFA (see Figure S9). In absence of cell lysate, the concentration of 4-<sup>19</sup>F-Phe-BsCspB has been determined using absorbance.

| $c^{\text{cell lysate}} / \text{g cell pellet} / \text{L lysis buffer}$ | $c^{4-19\text{F-Phe-BsCspB}} / \mu\text{M}$ |
|-------------------------------------------------------------------------|---------------------------------------------|
| 0                                                                       | 100.0                                       |
| 150                                                                     | ~ 5                                         |
| 450                                                                     | ~ 10                                        |

**Table S2.** Estimation of the concentration of 5-<sup>19</sup>F-Trp-BsCspB variant present at different concentrations of cell lysate determined by applying one-dimensional <sup>19</sup>F NMR spectroscopy and using the resonance signal of TFA (see Figure S9). In absence of cell lysate, the concentration of 5-<sup>19</sup>F-Trp-BsCspB has been determined using absorbance.

| $c^{\text{cell lysate}} / \text{g cell pellet} / \text{L lysis buffer}$ | $c^{5-19\text{F-Trp-BsCspB}} / \mu\text{M}$ |
|-------------------------------------------------------------------------|---------------------------------------------|
| 0                                                                       | 200.0                                       |
| 120                                                                     | ~ 5                                         |
| 240                                                                     | ~ 20                                        |
| 260                                                                     | ~ 25                                        |
| 450                                                                     | ~ 70                                        |

**Table S3.** Relation of the weight of dry cell pellet to the weight of wet cell pellet per litre of lysis buffer [5].

| $c^{\text{cell lysate}} / \text{g wet cell pellet} / \text{L lysis buffer}$ | $c^{\text{cell lysate}} / \text{g dry cell pellet} / \text{L lysis buffer}$ |
|-----------------------------------------------------------------------------|-----------------------------------------------------------------------------|
| 120                                                                         | 30                                                                          |
| 150                                                                         | 35                                                                          |
| 240                                                                         | 55                                                                          |
| 260                                                                         | 60                                                                          |
| 450                                                                         | 100                                                                         |

**Table S4.** Volume and mass of used cell culture, cell pellet and lysis buffer and resulting cell lysate concentration.

| $V \text{ cell culture} / \text{mL}$ | $m \text{ cell pellet} / \text{g}$ | $V \text{ lysis buffer} / \text{mL}$ | $c \text{ cell lysate} / \text{g cell pellet} / \text{L lysis buffer}$ |
|--------------------------------------|------------------------------------|--------------------------------------|------------------------------------------------------------------------|
| 50                                   | 0.36                               | 3.0                                  | 120                                                                    |
| 125                                  | 1.20                               | 5.0                                  | 240                                                                    |
| 125                                  | 1.29                               | 5.0                                  | 260                                                                    |
| 125                                  | 1.66                               | 3.7                                  | 450                                                                    |
| 125                                  | 0.75                               | 5.0                                  | 150                                                                    |
| 250                                  | 1.96                               | 4.4                                  | 450                                                                    |

## References

- [1] H. Welte, M. Kovermann, *Protein Express Purif* **2019**, *157*, 86-91.
- [2] F. Delaglio, S. Grzesiek, G. W. Vuister, G. Zhu, J. Pfeifer, A. Bax, *J Biomol Nmr* **1995**, *6*, 277-293.
- [3] M. M. Santoro, D. W. Bolen, *Biochemistry* **1988**, *27*, 8063-8068.
- [4] J. R. Warren, J. A. Gordon, *J Phys Chem* **1966**, *70*, 297-&.
- [5] J. Glazyrina, E.-M. Materne, T. Dreher, D. Storm, S. Junne, T. Adams, G. Greller, P. Neubauer, *Microbial Cell Factories* **2010**, *9*, 42.

## Author Contributions

HW and MK designed research. HW performed research. HW analyzed data. HW and MK wrote the manuscript.
